# Supplementary material
Source: PubMed Central journal article supplement (PMC3542473)
Supplement: mmc1.pdf [file mmc1.pdf]

American Journal of Human Genetics, Volume 92

## Supplemental Information

### Germline *PIK3CA* and *AKT1* Mutations

### in Cowden and Cowden-like Syndromes

Mohammed S. Orloff, Xin He, Charissa Peterson, Fusong Chen, Jin-Lian Chen,  
Jessica L. Mester, and Charis Eng

## Supplemental Inventory

### 1. Supplemental Figures and Tables

Figure S1

Figure S2

Table S1

Table S2

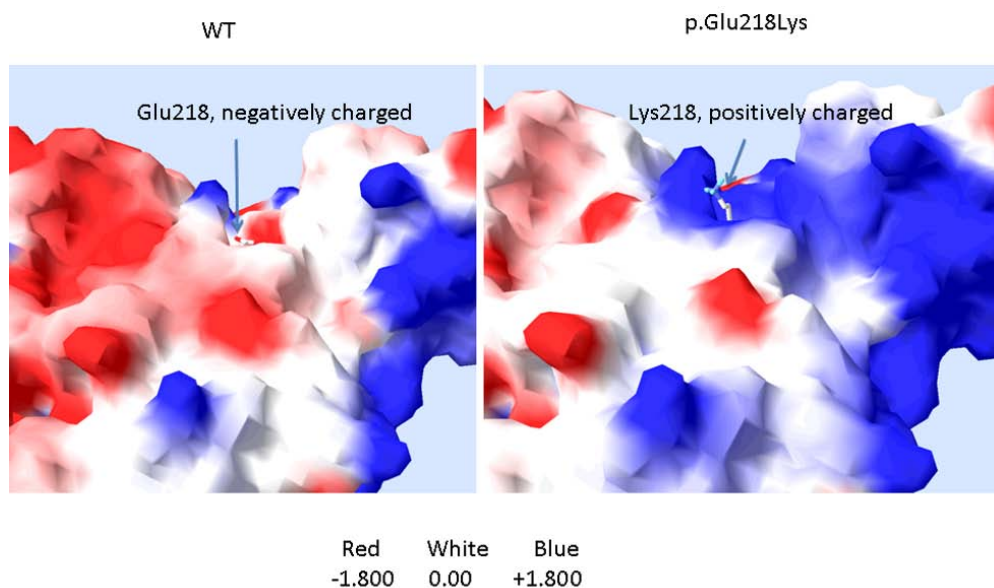

**Figure S1. Three-Dimensional Modeling of PIK3CA–Glu218Lys**

p.Glu218Lys change alters the overall surface charge of the area from negative (red) to positive charge (blue)

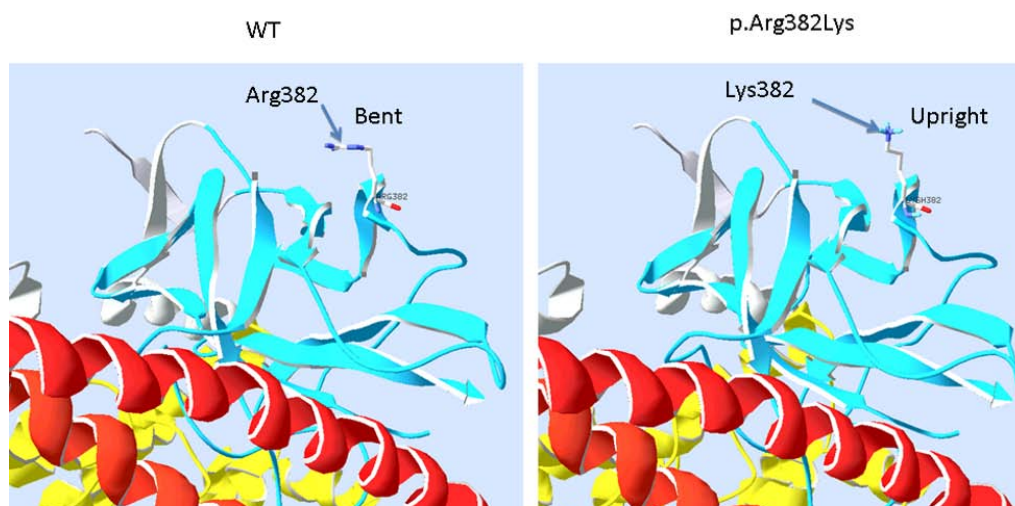

**Figure S2. Three-Dimensional Modeling of PIK3CA–Arg382Lys Mutation**

p.Arg382Lys change exposes its positive charge upright on the C2 domain, which may alter the protein or lipid layer binding

**Table 1. List of Primers Designed for *AKT1*, *PIK3CA*, *PIK3R1* and *PIK3R2***

| <b>Gene</b>     | <b>Primer Name</b>   | <b>Primers 5---&gt;3</b> |
|-----------------|----------------------|--------------------------|
| <b>AKT1</b>     | Exon 1-Forward       | TGGGGGTCAGAGAGCTTAGA     |
|                 | Exon 1-Reverse       | ACCAGGAAGCCACTCAGATG     |
|                 | Exon 2-Forward       | TGTCCATGGTACTCCATCCC     |
|                 | Exon 2-Reverse       | CAGCCAGTGCTTGTTGCTT      |
|                 | Exon 3-Forward       | CGAGAAACTGAGGCTTGGAG     |
|                 | Exon 3-Reverse       | GTTTCCAAACTGGGCTCTGA     |
|                 | Exon 4-Forward       | TGACCCTGAGTGTATGTGGC     |
|                 | Exon 4-Reverse       | CTACATGGAAAACCGGCCTA     |
|                 | Exon 5-Forward       | GTCCTCTTCCCATGTGTCAGA    |
|                 | Exon 5-Reverse       | AGTCCACGGTGTGTAAAGCC     |
|                 | Exon 6-Forward       | GGTGATCCTGGTGAAGGAGA     |
|                 | Exon 6-Reverse       | AGTCCACGGTGTGTAAAGCC     |
|                 | Exon 7-Forward       | GGTATCAGGCGACGTGGTAT     |
|                 | Exon 7-Reverse       | AGGAACAAGTCACCCACAG      |
|                 | Exon 8-Forward       | CTGTGGGGTGACTTGTTCT      |
|                 | Exon 8-Reverse       | CTTAATGTGCCCGTCCTTGT     |
|                 | Exon 9-Forward       | TCTATGGCGCTGAGATTGTG     |
|                 | Exon 9-Reverse       | CATCTCGTACATGACCACGC     |
|                 | Exon 10-Forward      | ACAAGGACGGGCACATTAAG     |
|                 | Exon 10-Reverse      | CCTGAGGCTTTGGAGATCAG     |
|                 | Exon 11-Forward      | GCCCTACATCACAGGAGGAA     |
|                 | Exon 11-Reverse      | AGGGGAGGAGGAAACTCAGA     |
|                 | Exon 12-Forward      | CTGTTGAGGGTTGTCTCCGT     |
|                 | Exon 12-Reverse      | ACAGCTCCAGTAGGAAGCCA     |
|                 | Exon 13-Forward      | TGGCTTCCTACTGGAGCTGT     |
|                 | Exon 13-Reverse      | CTCAAATGCACCCGAGAAAT     |
| <b>PIK3CA</b>   | Exon 1-Forward       | TGCTTTGGGACAACCATACA     |
|                 | Exon 1-Reverse       | AGAGCAAAGGCAGCAAACAT     |
|                 | Exon 2-Forward       | ATGTTTGCTGCCTTTGCTCT     |
|                 | Exon 2-Reverse       | ATAAGCAGTCCCTGCCTTCA     |
|                 | Exon 3-Forward       | GCAGCCCGCTCAGATATAAA     |
|                 | Exon 3-Reverse       | CATGGTGCAAAACCTGTCTC     |
|                 | Exon 4-Forward       | TTTTTGCTCCAGTTAAGGG      |
|                 | Exon 4-Reverse       | AGGTCTTTCTGCCAAACGAA     |
|                 | Exon 5-Forward       | TAAGGGGATTGTGGGCCTAT     |
|                 | Exon 5-Reverse       | CTGGCCAGTGCCTAGCTAAT     |
|                 | Exon 6-Forward       | CCCTTGGCATCATCAGTCTT     |
|                 | Exon 6-Reverse       | TGAACCAAAGCAAGCATGAG     |
|                 | Exon 7-Forward       | CTCATGCTTGCTTTGGTTCA     |
|                 | Exon 7-Reverse       | TTGGCATGCTCTTCAATCAC     |
|                 | Exon 8-Forward       | AAGGAACACTGTCCATTGGC     |
|                 | Exon 8-Reverse       | TAGTGCTTTCCAGTGCTT       |
| Exon 9-Forward  | CTGTGAATCCAGAGGGGAAA |                          |
| Exon 9-Reverse  | TGCTGAGATCAGCCAAATTC |                          |
| Exon 10-Forward | GGGGTTCCCTTTCATTTTC  |                          |

|                 |                         |
|-----------------|-------------------------|
| Exon 10-Reverse | GGCCAATCTTTTACCAAGCA    |
| Exon 11-Forward | GGCAGTGTTTTAGATGGCTCA   |
| Exon 11-Reverse | CAAATCAGGGTCAGTTTCTGC   |
| Exon 12-Forward | CATGCAGAACTGACCCTGA     |
| Exon 12-Reverse | GGAAACTCTTCCAGCCAAA     |
| Exon 13-Forward | CAGGAACTACCTGAAACTCATGG |
| Exon 13-Reverse | TTGGCCACCTTCTATGTTCC    |
| Exon 14-Forward | CCCTGCTCTACAGCCAAAAG    |
| Exon 14-Reverse | TGAGGGTAGGAGAATGAGAGAGA |
| Exon 15-Forward | TGGATGCTCTACAGGGCTTT    |
| Exon 15-Reverse | AGAGGGCAGGGATTCTGTTT    |
| Exon 16-Forward | CATGCTTGTGATCCCAGTTG    |
| Exon 16-Reverse | AATGGTGACACTCCAGAGGC    |
| Exon 17-Forward | GGGGAAAGGCAGTAAAGGTC    |
| Exon 17-Reverse | CACAAACACCGACAGACTCA    |
| Exon 18-Forward | AAATGGAACTTGCACCCTG     |
| Exon 18-Reverse | GTCAAACAAATGGCACACG     |
| Exon 19-Forward | TCATGGTGAAAGACGATGGA    |
| Exon 19-Reverse | GCTGGTTTCAATTCCTGAGC    |
| Exon 20-Forward | CAGGCATTGTTGTAGGTGCT    |

|                             |                        |
|-----------------------------|------------------------|
| <b>PIK3R1</b> Exon1-Forward | GCCAGTCACCTCTCCTCTTAAA |
| Exon1-Reverse               | CAGAACATAACGACTCAACCCA |
| Exon2-Forward               | AGACCCTAGGTGAGAAGCAGTG |
| Exon2-Reverse               | AACAGTTTGAGTGTCCAGCAGA |
| Exon3-Forward               | ACTGGATGGAACTGGAATGTC  |
| Exon3-Reverse               | CTGAAACAGAAAGCCAAGACCT |
| Exon4-Forward               | GAGACCTCCACAGGAAAAATTG |
| Exon4-Reverse               | GCAAATGAGAATCTGGGTCTTC |
| Exon5-Forward               | GTACTGTGTGCTTCTCCCAACA |
| Exon5-Reverse               | TACCCTCATCACCCCAAATAC  |
| Exon6-Forward               | AGATTCTCAGCAGCCAGGTAAG |
| Exon6-Reverse               | TTGAAGGGTACAGGGAActCTC |
| Exon7-Forward               | GTAGTTGGGATTGCGAACAAct |
| Exon7-Reverse               | ACTTAGCAAGCTGGTGCTTTTC |
| Exon8-Forward               | ATCTATGTGGGCAGGAGGAATA |
| Exon8-Reverse               | CAGAGAAGCCATATTTCCCATC |
| Exon9-Forward               | GCGTCTACTAAAATGCATGGTG |
| Exon9-Reverse               | GGGATGTGCGGGTATATTCTT  |
| Exon10-Forward              | CCAGTATCCAAATACCAACAGG |
| Exon10-Reverse              | CCCACCTCATTTCGTAAAACTC |
| Exon11-Forward              | CTGGTCACTCATGTATCTGGGA |
| Exon11-Reverse              | CAGAGTGATATTCCCCTTCCTG |
| Exon12-Forward              | GAAAActGCTGGGAAACCATAG |
| Exon12-Reverse              | ACACCTTTTTGAGTCAACCACC |
| Exon13-Forward              | ATCCAGCTGAGAAAGACGAGAG |
| Exon13-Reverse              | GGGACATCATTATGGACACAGA |
| Exon14-Forward              | AGGTACCTGAGTGTGGTTGCTT |

Exon14-Reverse ACAGCTGCTTTGGTTTCTCTTC  
Exon15-Forward CCCAAGTTGAGACTGCACAATA  
Exon15-Reverse TCACAGATCAGACTGGAGAGGA

**PIK3R2** Exon1-Forward CCCTTGTAAGGGTCATGGAATA  
Exon1-Reverse ACTCTCATCCCTTCTTGAACCA  
Exon2-Forward CTAACCCAGAAAATTGTGTCCC  
Exon2-Reverse CCTATTCAACATAGAGGCCAG  
Exon3-Forward GCCTCTATGTTGAATAGGGCAC  
Exon3-Reverse ACGTCCAACATCATGTGTACTGG  
Exon4-Forward GCCTCTATGTTGAATAGGGCAC  
Exon4-Reverse CCCCTCCCTTCTTAGGGTCTA  
Exon5-Forward CAGTACACATGAGTTGGACGTG  
Exon5-Reverse CATAGATTCTCACACAAAGGCG  
Exon6-Forward GTGCCTGTATCATCTCCTCCTC  
Exon6-Reverse CTCAGGGATCAGTATTTACGGC  
Exon7-Forward GCCGTAAATACTGATCCCTGAG  
Exon7-Reverse CTTGCTAGAAGCATCTCGGACT  
Exon8-Forward TATACAGTCGGTGCTCAGGATG  
Exon8-Reverse GATTACAGGTGTAAGCCACCGT  
Exon9-Forward GAGCAGCAAGACTCTGTCTCAA  
Exon9-Reverse TCTATGTCTCGGTTTCCCTCAT  
Exon10-Forward GGAACAATAAGCTGATCAAGG  
Exon10-Reverse TCTATGTCTCGGTTTCCCTCAT  
Exon11-Forward GAGTTGAGATGTGCCTTTACCC  
Exon11-Reverse CCTAAAGTGCTGGGATTACAGG  
Exon12-Forward CTTGATCCCAGGAGTTTGAGAC  
Exon12-Reverse GCACACACCTCTGACTAAGCTG  
Exon13-Forward CGGAGATATTGTACCCAGAACC  
Exon13-Reverse TCCCTGGTGAACCTCCTACTCAT  
Exon14-Forward ATGAGTAGGAGTTCACCAGGGA  
Exon14-Reverse CATTCAATGAGAGCTCTGGGAG  
Exon15-Forward AGAGCTCTCATTGAATGCCTG  
Exon15-Reverse CAGAGAAAAGGAGACAGAGGGA

---
